# Supplementary material for: (1‐aryloxy‐2‐hydroxypropyl)‐phenylpiperazine derivatives suppress Candida albicans virulence by interfering with morphological transition
Source: PubMed Central journal article supplement (PMC6196381; doi:10.1111/1751-7915.13307), 2018-09-17
Supplement: MBT2-11-1080-s001.pdf [file MBT2-11-1080-s001.pdf]

1 **Supplementary Information:**

2 **Zhao et al.,**

3 **(1-aryloxy-2-hydroxypropyl)-phenylpiperazine derivatives suppress**

4 ***Candida albicans* virulence by interfering with morphological transition**

5

6

7

8

9

10

11

12

13

14

15

16

17

18 Table S1. Analysis of chemical structures of piperazine derivatives

| Com. No. | Structure | Description of Mass Spectra                                                                                                                                                                                     | Description of NMR Spectra                                                                                                                                                                                                                                                                                                                               |
|----------|-----------|-----------------------------------------------------------------------------------------------------------------------------------------------------------------------------------------------------------------|----------------------------------------------------------------------------------------------------------------------------------------------------------------------------------------------------------------------------------------------------------------------------------------------------------------------------------------------------------|
| 1c       |           | ESI ( <i>m/z</i> ): [M+H] <sup>+</sup><br>343.3.<br><br>HRESIMS <i>m/z</i> :<br>343.2026 (M <sup>+</sup> +H,<br>calcd for C <sub>20</sub> H <sub>27</sub> N <sub>2</sub> O <sub>3</sub> ,<br>343.1943).         | <sup>1</sup> H NMR (500 MHz, DMSO),<br>δ (ppm): 6.79-7.29 (m, 9H,<br>ArH), 3.96-3.98 (m, 2H, -<br>OCH <sub>2</sub> -), 3.85-3.88 (m, 1H, -<br>CH-OH), 3.66 (s, 3H, -OCH <sub>3</sub> -<br>), 3.50 (brs, 2H, -CH <sub>2</sub> -N),<br>2.97-2.99 (brs, 4H,<br>piperazinyl right H), 2.54-<br>2.62 (m, 4H, piperazinyl left<br>H).                          |
| 2c*      |           | ESI ( <i>m/z</i> ): [M+H] <sup>+</sup><br>373.3.<br><br>HRESIMS <i>m/z</i> :<br>373.2123 (M <sup>+</sup> +H,<br>calcd for C <sub>21</sub> H <sub>29</sub> N <sub>2</sub> O <sub>4</sub> ,<br>373.2049).         | <sup>1</sup> H NMR (500 MHz, DMSO),<br>δ (ppm): 6.91-7.40 (m, 9H,<br>ArH), 3.99-4.01 (m, 2H, -<br>OCH <sub>2</sub> -), 3.87-3.91 (m, 1H, -<br>CH-OH), 3.57 (s, 2H, -CH <sub>2</sub> -<br>N), 2.97 (brs, 4H, piperazinyl<br>right H), 2.63 (m, 4H,<br>piperazinyl left H), 2.50-2.55<br>(m, 2H, -CH <sub>2</sub> -N).                                     |
| 3c       |           | ESI ( <i>m/z</i> ): [M+H] <sup>+</sup><br>373.3.<br><br>HRESIMS <i>m/z</i> :<br>373.2132 (M <sup>+</sup> +H,<br>calcd<br>for<br>C <sub>21</sub> H <sub>28</sub> ClN <sub>2</sub> O <sub>4</sub> ,<br>373.2049). | <sup>1</sup> H NMR (500 MHz, DMSO),<br>δ (ppm): 6.40-7.29 (m, 8H,<br>ArH), 3.96-3.98 (m, 2H, -<br>OCH <sub>2</sub> -), 3.83-3.87 (m, 1H, -<br>CH-OH), 3.72 (s, 3H, -<br>OCH <sub>3</sub> ), 3.68 (s, 3H, -OCH <sub>3</sub> ),<br>3.57 (s, 2H, -CH <sub>2</sub> -N), 2.84<br>(brs, 4H, piperazinyl right H),<br>2.55 (m, 4H, piperazinyl left<br>H).      |
| 4c*      |           | ESI ( <i>m/z</i> ): [M+H] <sup>+</sup><br>373.3.<br><br>HRESIMS <i>m/z</i> :<br>373.2132 (M <sup>+</sup> +H,<br>calcd for C <sub>21</sub> H <sub>29</sub> N <sub>2</sub> O <sub>4</sub> ,<br>373.2049).         | <sup>1</sup> H NMR (500 MHz, DMSO),<br>δ (ppm): 6.41-7.28 (m, 8H,<br>ArH), 3.96-3.98 (m, 2H, -<br>OCH <sub>2</sub> -), 3.84-3.88 (m, 1H, -<br>CH-OH), 3.69 (s, 3H, -<br>OCH <sub>3</sub> ), 3.65 (s, 3H, -OCH <sub>3</sub> ),<br>2.94 (brs, 4H, piperazinyl<br>right H), 2.57 (m, 4H,<br>piperazinyl left H), 2.47-2.51<br>(m, 2H, -CH <sub>2</sub> -N). |
| 5c*      |           | ESI ( <i>m/z</i> ): [M+H] <sup>+</sup><br>407.3.<br><br>HRESIMS <i>m/z</i> :<br>407.1738 (M <sup>+</sup> +H,<br>calcd<br>for<br>C <sub>21</sub> H <sub>28</sub> ClN <sub>2</sub> O <sub>4</sub> ,<br>407.1659). | <sup>1</sup> H NMR (500 MHz, DMSO),<br>δ (ppm): 6.76-7.30 (m, 7H,<br>ArH), 3.98-4.00 (m, 2H, -<br>OCH <sub>2</sub> -), 3.85-3.89 (m, 1H, -<br>CH-OH), 3.82 (s, 6H, -<br>OCH <sub>3</sub> ×2), 2.87 (brs, 4H,<br>piperazinyl right H), 2.56-<br>2.59 (brs, 4H, piperazinyl left<br>H), 2.48-2.52 (brs, 2H, -CH <sub>2</sub> -<br>N).                      |

|      |                                                                                     |                                                                                                                                                                                                            |                                                                                                                                                                                                                                                                                                                                                                                         |
|------|-------------------------------------------------------------------------------------|------------------------------------------------------------------------------------------------------------------------------------------------------------------------------------------------------------|-----------------------------------------------------------------------------------------------------------------------------------------------------------------------------------------------------------------------------------------------------------------------------------------------------------------------------------------------------------------------------------------|
| 6c*  | 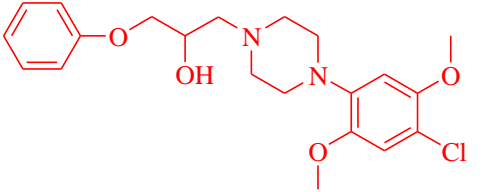   | <p>ESI (<i>m/z</i>): [M+H]<sup>+</sup><br/>407.3.</p> <p>HRESIMS <i>m/z</i>:<br/>407.1742 (M<sup>+</sup>+H,<br/>calcd for<br/>C<sub>21</sub>H<sub>28</sub>ClN<sub>2</sub>O<sub>4</sub>,<br/>407.1659).</p> | <p><sup>1</sup>H NMR (500 MHz, DMSO),<br/>δ (ppm): 6.63-7.30 (m, 7H,<br/>ArH), 3.97-4.01 (m, 2H, -<br/>OCH<sub>2</sub>-), 3.86-3.88 (m, 1H, -<br/>CH-OH), 3.79 (s, 3H, -<br/>OCH<sub>3</sub>), 3.74 (s, 3H, -OCH<sub>3</sub>),<br/>3.00 (brs, 4H, piperazinyl<br/>right H), 2.59 (brs, 4H,<br/>piperazinyl left H), 2.50-2.52<br/>(m, 2H, -CH<sub>2</sub>-N).</p>                       |
| 7c*  |    | <p>ESI (<i>m/z</i>): [M+H]<sup>+</sup><br/>357.3.</p> <p>HRESIMS <i>m/z</i>:<br/>357.2178 (M<sup>+</sup>+H,<br/>calcd for C<sub>21</sub>H<sub>29</sub>N<sub>2</sub>O<sub>3</sub>,<br/>357.21).</p>         | <p><sup>1</sup>H NMR (500 MHz, DMSO),<br/>δ (ppm): 6.83-7.28 (m, 9H,<br/>ArH), 3.96-3.98 (m, 4H, -<br/>OCH<sub>2</sub>-x2), 3.86 (brs, 1H, -<br/>CH-OH), 2.95 (brs, 4H,<br/>piperazinyl right H), 2.58<br/>(brs, 4H, piperazinyl left H),<br/>2.43 (m, 2H, -CH<sub>2</sub>-N), 1.31 (t,<br/>3H, -CH<sub>3</sub>).</p>                                                                   |
| 8c*  |    | <p>ESI (<i>m/z</i>): [M+H]<sup>+</sup><br/>401.3.</p> <p>HRESIMS <i>m/z</i>:<br/>401.2440 (M<sup>+</sup>+H,<br/>calcd for C<sub>23</sub>H<sub>33</sub>N<sub>2</sub>O<sub>4</sub>,<br/>401.2362).</p>       | <p><sup>1</sup>H NMR (500 MHz, DMSO),<br/>δ (ppm): 6.39-7.30 (m, 8H,<br/>ArH), 3.97-4.00 (m, 2H, -<br/>OCH<sub>2</sub>-), 3.90-3.95 (m, 4H, -<br/>OCH<sub>2</sub>CH<sub>3</sub>x2), 3.87-3.88 (m,<br/>1H, -CH-OH), 2.98 (brs, 4H,<br/>piperazinyl right H), 2.59<br/>(brs, 4H, piperazinyl left H),<br/>2.52 (m, 2H, -CH<sub>2</sub>-N), 1.27-<br/>1.31 (m, 6H, -CH<sub>3</sub>x2).</p> |
| 9c   |  | <p>ESI (<i>m/z</i>): [M+H]<sup>+</sup><br/>341.3.</p> <p>HRESIMS <i>m/z</i>:<br/>341.2233 (M<sup>+</sup>+H,<br/>calcd for C<sub>21</sub>H<sub>29</sub>N<sub>2</sub>O<sub>2</sub>,<br/>341.2151).</p>       | <p><sup>1</sup>H NMR (500 MHz, DMSO),<br/>δ (ppm): 6.82-7.28 (m, 8H,<br/>ArH), 3.96-4.00 (m, 2H, -<br/>OCH<sub>2</sub>-), 3.85-3.88 (m, 1H, -<br/>CH-OH), 2.76 (brs, 4H,<br/>piperazinyl right H), 2.59<br/>(brs, 4H, piperazinyl left H),<br/>2.42-2.53 (m, 2H, -CH<sub>2</sub>-N),<br/>2.17 (s, 3H, -CH<sub>3</sub>), 2.12 (s,<br/>3H, -CH<sub>3</sub>).</p>                          |
| 10c* |  | <p>ESI (<i>m/z</i>): [M+H]<sup>+</sup><br/>341.3.</p> <p>HRESIMS <i>m/z</i>:<br/>341.2233 (M<sup>+</sup>+H,<br/>calcd for C<sub>21</sub>H<sub>29</sub>N<sub>2</sub>O<sub>2</sub>,<br/>341.2151).</p>       | <p><sup>1</sup>H NMR (500 MHz, DMSO),<br/>δ (ppm): 6.88-7.30 (m, 8H,<br/>ArH), 3.99-4.01 (m, 2H, -<br/>OCH<sub>2</sub>-), 3.86-3.90 (m, 1H, -<br/>CH-OH), 2.78 (brs, 4H,<br/>piperazinyl right H), 2.59<br/>(brs, 4H, piperazinyl left H),<br/>2.50-2.54 (m, 2H, -CH<sub>2</sub>-N),<br/>2.19 (s, 6H, -CH<sub>3</sub>x2).</p>                                                           |
| 11c  |  | <p>ESI (<i>m/z</i>): [M+H]<sup>+</sup><br/>347.2.</p> <p>HRESIMS <i>m/z</i>:<br/>347.1533 (M<sup>+</sup>+H,<br/>calcd for<br/>C<sub>19</sub>H<sub>24</sub>ClN<sub>2</sub>O<sub>2</sub>,</p>                | <p><sup>1</sup>H NMR (500 MHz, DMSO),<br/>δ (ppm): 6.91-7.40 (m, 9H,<br/>ArH), 3.99-4.01 (m, 2H, -<br/>OCH<sub>2</sub>-), 3.87-3.91 (m, 1H, -<br/>CH-OH), 3.57 (s, 2H, -CH<sub>2</sub>-<br/>N), 2.97 (brs, 4H, piperazinyl<br/>right H), 2.63 (m, 4H,<br/>piperazinyl left H), 2.50-2.55</p>                                                                                            |

|             |  |                                                                                                                                                                                                                            |                                                                                                                                                                                                                                                                                                                                               |
|-------------|--|----------------------------------------------------------------------------------------------------------------------------------------------------------------------------------------------------------------------------|-----------------------------------------------------------------------------------------------------------------------------------------------------------------------------------------------------------------------------------------------------------------------------------------------------------------------------------------------|
|             |  | 347.1448).                                                                                                                                                                                                                 | (m, 2H, -CH <sub>2</sub> -N).                                                                                                                                                                                                                                                                                                                 |
| <b>12c</b>  |  | ESI ( <i>m/z</i> ): [M+H] <sup>+</sup><br>381.3.<br><br>HRESIMS <i>m/z</i> :<br>381.1139 (M <sup>+</sup> +H,<br>calcd for<br>C <sub>19</sub> H <sub>23</sub> Cl <sub>2</sub> N <sub>2</sub> O <sub>2</sub> ,<br>381.1058). | <sup>1</sup> H NMR (500 MHz, DMSO),<br>δ (ppm): 6.86-7.35 (m, 8H,<br>ArH), 3.94-3.99 (m, 2H, -<br>OCH <sub>2</sub> -), 3.84-3.88 (m, 1H, -<br>CH-OH), 3.12 (brs, 4H,<br>piperazinyl right H), 2.53-<br>2.58 (m, 4H, piperazinyl left<br>H), 2.47-2.52 (m, 2H, -CH <sub>2</sub> -<br>N).                                                       |
| <b>13c*</b> |  | ESI ( <i>m/z</i> ): [M+H] <sup>+</sup><br>391.2.<br><br>HRESIMS <i>m/z</i> :<br>391.1021 (M <sup>+</sup> +H,<br>calcd for<br>C <sub>19</sub> H <sub>24</sub> BrN <sub>2</sub> O <sub>2</sub> ,<br>391.0943).               | <sup>1</sup> H NMR (500 MHz, DMSO),<br>δ (ppm): 6.92-7.55 (m, 9H,<br>ArH), 3.97-3.99 (m, 2H, -<br>OCH <sub>2</sub> -), 3.87 (brs, 1H, -CH-<br>OH), 2.93 (brs, 4H,<br>piperazinyl right H), 2.61<br>(brs, 4H, piperazinyl left H),<br>2.51 (m, 2H, -CH <sub>2</sub> -N).                                                                       |
| <b>14d</b>  |  | ESI ( <i>m/z</i> ): [M+H] <sup>+</sup><br>411.2.<br><br>HRESIMS <i>m/z</i> :<br>411.1244 (M <sup>+</sup> +H,<br>calcd for<br>C <sub>20</sub> H <sub>25</sub> Cl <sub>2</sub> N <sub>2</sub> O <sub>3</sub> ,<br>411.1164). | <sup>1</sup> H NMR (500 MHz, DMSO),<br>δ (ppm): 6.77-7.51 (m, 7H,<br>ArH), 4.03-4.06 (m, 1H, -CH-<br>OH), 3.97-4.02 (m, 2H, -<br>OCH <sub>2</sub> -), 3.65 (s, 3H, -<br>OCH <sub>3</sub> ), 2.95 (brs, 4H,<br>piperazinyl right H), 2.52-<br>2.57 (m, 4H, piperazinyl left<br>H), 2.50 (brs, 2H, -CH <sub>2</sub> -N).                        |
| <b>15d*</b> |  | ESI ( <i>m/z</i> ): [M+H] <sup>+</sup><br>475.3.<br><br>HRESIMS <i>m/z</i> :<br>475.0962 (M <sup>+</sup> +H,<br>calcd for<br>C <sub>21</sub> H <sub>26</sub> Cl <sub>2</sub> N <sub>2</sub> O <sub>4</sub> ,<br>475.088).  | <sup>1</sup> H NMR (500 MHz, DMSO),<br>δ (ppm): 6.71-7.48 (m, 5H,<br>ArH), 4.03-4.05 (m, 1H, -CH-<br>OH), 3.96-3.98 (m, 2H, -<br>OCH <sub>2</sub> -), 3.79 (s, 6H, -<br>OCH <sub>3</sub> ×2), 2.83 (brs, 4H,<br>piperazinyl right H), 2.54 (m,<br>4H, piperazinyl left H), 2.50<br>(brs, 2H, -CH <sub>2</sub> -N).                            |
| <b>16d*</b> |  | ESI ( <i>m/z</i> ): [M+H] <sup>+</sup><br>441.3.<br><br>HRESIMS <i>m/z</i> :<br>441.1350 (M <sup>+</sup> +H,<br>calcd for<br>C <sub>21</sub> H <sub>27</sub> Cl <sub>2</sub> N <sub>2</sub> O <sub>4</sub> ,<br>441.127).  | <sup>1</sup> H NMR (500 MHz, DMSO),<br>δ (ppm): 6.38-7.49 (m, 6H,<br>ArH), 4.04-4.05 (m, 1H, -CH-<br>OH), 3.98 (brs, 2H, -OCH <sub>2</sub> -),<br>3.72 (s, 3H, -OCH <sub>3</sub> ), 3.67 (s,<br>3H, -OCH <sub>3</sub> ), 2.82 (brs, 4H,<br>piperazinyl right H), 2.54 (m,<br>4H, piperazinyl left H), 2.50<br>(brs, 2H, -CH <sub>2</sub> -N). |
| <b>17d*</b> |  | ESI ( <i>m/z</i> ): [M+H] <sup>+</sup><br>475.3.<br><br>HRESIMS <i>m/z</i> :<br>475.0959 (M <sup>+</sup> + H,<br>calcd for<br>C <sub>21</sub> H <sub>26</sub> Cl <sub>2</sub> N <sub>2</sub> O <sub>4</sub> ,<br>475.088). | <sup>1</sup> H NMR (500 MHz, DMSO),<br>δ (ppm): 6.60-7.52 (m, 5H,<br>ArH), 4.05-4.07 (m, 1H, -CH-<br>OH), 3.98-4.00 (m, 2H, -<br>OCH <sub>2</sub> -), 3.77 (s, 3H, -<br>OCH <sub>3</sub> ), 3.72 (s, 3H, -OCH <sub>3</sub> ),<br>2.97 (brs, 4H, piperazinyl<br>right H), 2.56 (brs, 4H,<br>piperazinyl left H), 2.50 (brs,                    |

|      |                                                                                     |                                                                                                                                                                                                                              |                                                                                                                                                                                                                                                                                                                                                       |
|------|-------------------------------------------------------------------------------------|------------------------------------------------------------------------------------------------------------------------------------------------------------------------------------------------------------------------------|-------------------------------------------------------------------------------------------------------------------------------------------------------------------------------------------------------------------------------------------------------------------------------------------------------------------------------------------------------|
|      |                                                                                     |                                                                                                                                                                                                                              | 2H, -CH <sub>2</sub> -N).                                                                                                                                                                                                                                                                                                                             |
| 18d* | 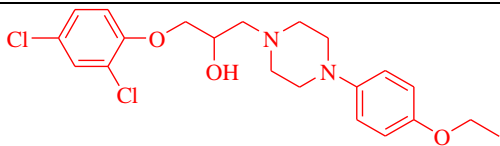   | ESI ( <i>m/z</i> ): [M+H] <sup>+</sup><br>425.3.<br><br>HRESIMS <i>m/z</i> :<br>425.1393 (M <sup>+</sup> +H,<br>calcd for<br>C <sub>21</sub> H <sub>27</sub> Cl <sub>2</sub> N <sub>2</sub> O <sub>3</sub> ,<br>425.132).    | <sup>1</sup> H NMR (500 MHz, DMSO),<br>δ (ppm): 6.82-7.51 (m, 7H,<br>ArH), 3.94-3.99 (m, 4H, -<br>OCH <sub>2</sub> -x2), 4.04-4.06 (brs,<br>1H, -CH-OH), 2.94 (brs, 4H,<br>piperazinyl right H), 2.57<br>(brs, 4H, piperazinyl left H),<br>2.43 (m, 2H, -CH <sub>2</sub> -N), 1.30 (t,<br>3H, -CH <sub>3</sub> ).                                     |
| 19d* |    | ESI ( <i>m/z</i> ): [M+H] <sup>+</sup><br>409.3.<br><br>HRESIMS <i>m/z</i> :<br>409.1442 (M <sup>+</sup> +H,<br>calcd for<br>C <sub>21</sub> H <sub>27</sub> Cl <sub>2</sub> N <sub>2</sub> O <sub>2</sub> ,<br>409.1371).   | <sup>1</sup> H NMR (500 MHz, DMSO),<br>δ (ppm): 6.83-7.53 (m, 6H,<br>ArH), 4.05-4.07 (m, 1H, -CH-<br>OH), 3.99-4.00 (m, 2H, -<br>OCH <sub>2</sub> -), 2.75 (brs, 4H,<br>piperazinyl right H), 2.56<br>(brs, 4H, piperazinyl left H),<br>2.46 (brs, 2H, -CH <sub>2</sub> -N), 2.17<br>(s, 3H, -CH <sub>3</sub> ), 2.12 (s, 3H, -<br>CH <sub>3</sub> ). |
| 20d* |   | ESI ( <i>m/z</i> ): [M+H] <sup>+</sup><br>409.3.<br><br>HRESIMS <i>m/z</i> :<br>409.1453 (M <sup>+</sup> +H,<br>calcd for<br>C <sub>21</sub> H <sub>27</sub> Cl <sub>2</sub> N <sub>2</sub> O <sub>2</sub> ,<br>409.1371).   | <sup>1</sup> H NMR (500 MHz, DMSO),<br>δ (ppm): 6.83-7.50 (m, 6H,<br>ArH), 4.04-4.06 (m, 1H, -CH-<br>OH), 3.97-4.01 (m, 2H, -<br>OCH <sub>2</sub> -), 2.73 (brs, 4H,<br>piperazinyl right H), 2.55<br>(brs, 4H, piperazinyl left H),<br>2.44 (brs, 2H, -CH <sub>2</sub> -N), 2.16<br>(s, 3H, -CH <sub>3</sub> ), 2.15 (s, 3H, -<br>CH <sub>3</sub> ). |
| 21d* |  | ESI ( <i>m/z</i> ): [M+H] <sup>+</sup><br>415.2.<br><br>HRESIMS <i>m/z</i> :<br>415.0752 (M <sup>+</sup> +H,<br>calcd for<br>C <sub>19</sub> H <sub>22</sub> Cl <sub>3</sub> N <sub>2</sub> O <sub>2</sub> ,<br>415.0669).   | <sup>1</sup> H NMR (500 MHz, DMSO),<br>δ (ppm): 7.00-7.53 (m, 7H,<br>ArH), 4.05-4.07 (m, 1H, -CH-<br>OH), 3.99 (brs, 2H, -OCH <sub>2</sub> -),<br>2.94 (brs, 4H, piperazinyl<br>right H), 2.61 (brs, 4H,<br>piperazinyl left H), 2.55 (brs,<br>2H, -CH <sub>2</sub> -N).                                                                              |
| 22d* |  | ESI ( <i>m/z</i> ): [M+H] <sup>+</sup><br>449.1.<br><br>HRESIMS <i>m/z</i> :<br>449.0364 (M <sup>+</sup> + H,<br>calcd for<br>C <sub>19</sub> H <sub>21</sub> Cl <sub>4</sub> N <sub>2</sub> O <sub>2</sub> ,<br>449.0279).  | <sup>1</sup> H NMR (500 MHz, DMSO),<br>δ (ppm): 6.83-7.47 (m, 6H,<br>ArH), 4.03-4.04 (m, 1H, -CH-<br>OH), 3.97-4.02 (m, 2H, -<br>OCH <sub>2</sub> -), 3.10 (brs, 4H,<br>piperazinyl right H), 2.54<br>(brs, 4H, piperazinyl left H),<br>2.44 (brs, 2H, -CH <sub>2</sub> -N).                                                                          |
| 23d* |  | ESI ( <i>m/z</i> ): [M+H] <sup>+</sup><br>461.1.<br><br>HRESIMS <i>m/z</i> :<br>461.0223 (M <sup>+</sup> +H,<br>calcd for<br>C <sub>19</sub> H <sub>22</sub> BrCl <sub>2</sub> N <sub>2</sub> O <sub>2</sub> ,<br>461.1922). | <sup>1</sup> H NMR (500 MHz, DMSO),<br>δ (ppm): 6.81-7.49 (m, 7H,<br>ArH), 4.02-4.05 (m, 2H, -<br>OCH <sub>2</sub> -), 3.96-4.01 (m, 1H, -<br>CH-OH), 3.05-3.06 (brs, 4H,<br>piperazinyl right H), 2.55-<br>2.56 (m, 4H, piperazinyl left<br>H), 2.50 (brs, 2H, -CH <sub>2</sub> -N).                                                                 |

|             |                                                                                     |                                                                                                                                                                                                                |                                                                                                                                                                                                                                                                                                                                                        |
|-------------|-------------------------------------------------------------------------------------|----------------------------------------------------------------------------------------------------------------------------------------------------------------------------------------------------------------|--------------------------------------------------------------------------------------------------------------------------------------------------------------------------------------------------------------------------------------------------------------------------------------------------------------------------------------------------------|
| <b>24e</b>  | 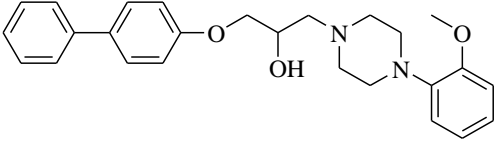   | ESI ( <i>m/z</i> ): [M+H] <sup>+</sup><br>419.3.<br><br>HRESIMS <i>m/z</i> :<br>419.2340 (M <sup>+</sup> +H,<br>calcd for C <sub>26</sub> H <sub>31</sub> N <sub>2</sub> O <sub>3</sub> ,<br>419.2256).        | <sup>1</sup> H NMR (500 MHz, DMSO),<br>δ (ppm): 6.85-7.59 (m, 13H,<br>ArH), 4.00-4.04 (m, 4H, -<br>OCH <sub>2</sub> -), 3.90-3.93 (m, 1H, -<br>CH-OH), 3.74 (s, 3H, -<br>OCH <sub>3</sub> ), 2.94 (brs, 4H,<br>piperazinyl right H), 2.59<br>(brs, 4H, piperazinyl left H),<br>2.44 (m, 2H, -CH <sub>2</sub> -N).                                      |
| <b>25e</b>  |    | ESI ( <i>m/z</i> ): [M+H] <sup>+</sup><br>419.3.<br><br>HRESIMS <i>m/z</i> :<br>419.2235 (M <sup>+</sup> +H,<br>calcd for C <sub>26</sub> H <sub>31</sub> N <sub>2</sub> O <sub>3</sub> ,<br>419.2256).        | <sup>1</sup> H NMR (500 MHz, DMSO),<br>δ (ppm): 6.80-7.62 (m, 13H,<br>ArH), 4.00-4.06(m, 2H, -<br>OCH <sub>2</sub> -), 3.92-3.95 (m, 1H, -<br>CH-OH), 3.67 (s, 3H, -<br>OCH <sub>3</sub> ), 3.00-3.02 (m, 4H,<br>piperazinyl right H), 2.56-<br>2.65 (brs, 4H, piperazinyl left<br>H), 2.41-2.45 (m, 2H, -CH <sub>2</sub> -<br>N).                     |
| <b>26e*</b> |   | ESI ( <i>m/z</i> ): [M+H] <sup>+</sup><br>449.3.<br><br>HRESIMS <i>m/z</i> :<br>449.2440 (M <sup>+</sup> +H,<br>calcd for C <sub>27</sub> H <sub>33</sub> N <sub>2</sub> O <sub>4</sub> ,<br>449.2362).        | <sup>1</sup> H NMR (500 MHz, DMSO),<br>δ (ppm): 6.39-7.59 (m, 12H,<br>ArH), 4.00-4.03 (m, 2H, -<br>OCH <sub>2</sub> -), 3.89-3.92 (m, 1H, -<br>CH-OH), 3.72 (s, 3H, -<br>OCH <sub>3</sub> ), 3.67 (s, 3H, -OCH <sub>3</sub> ),<br>3.61 (s, 2H, -CH <sub>2</sub> -N), 2.85<br>(brs, 4H, piperazinyl right H),<br>2.56 (brs, 4H, piperazinyl left<br>H). |
| <b>27e*</b> |  | ESI ( <i>m/z</i> ): [M+H] <sup>+</sup><br>483.3.<br><br>HRESIMS <i>m/z</i> :<br>483.2049 (M <sup>+</sup> +H,<br>calcd for<br>C <sub>27</sub> H <sub>32</sub> BrN <sub>2</sub> O <sub>4</sub> Cl,<br>483.1972). | <sup>1</sup> H NMR (500 MHz, DMSO),<br>δ (ppm): 6.73-7.59 (m, 11H,<br>ArH), 3.99-4.02 (m, 2H, -<br>OCH <sub>2</sub> -), 3.89-3.92 (m, 1H, -<br>CH-OH), 3.80 (s, 6H, -<br>OCH <sub>3</sub> ×2), 2.85 (brs, 4H,<br>piperazinyl right H), 2.56<br>(brs, 4H, piperazinyl left H),<br>2.44 (brs, 2H, -CH <sub>2</sub> -N).                                  |
| <b>28e*</b> |  | ESI ( <i>m/z</i> ): [M+H] <sup>+</sup><br>433.3.<br><br>HRESIMS <i>m/z</i> :<br>433.2497 (M <sup>+</sup> +H,<br>calcd for C <sub>27</sub> H <sub>33</sub> N <sub>2</sub> O <sub>3</sub> ,<br>433.2413).        | <sup>1</sup> H NMR (500 MHz, DMSO),<br>δ (ppm): 6.84-7.59 (m, 13H,<br>ArH), 3.94-4.03 (m, 4H, -<br>OCH <sub>2</sub> -×2), 3.91-3.93 (m, 1H,<br>-CH-OH), 2.96 (brs, 4H,<br>piperazinyl right H), 2.59<br>(brs, 4H, piperazinyl left H),<br>2.44 (m, 2H, -CH <sub>2</sub> -N), 1.31 (t,<br>3H, -CH <sub>3</sub> ).                                       |
| <b>29e*</b> |  | ESI ( <i>m/z</i> ): [M+H] <sup>+</sup><br>477.4.<br><br>HRESIMS <i>m/z</i> :<br>477.2755 (M <sup>+</sup> +H,<br>calcd for C <sub>29</sub> H <sub>37</sub> N <sub>2</sub> O <sub>4</sub> ,<br>477.2675).        | <sup>1</sup> H NMR (500 MHz, DMSO),<br>δ (ppm): 6.37-7.58 (m, 12H,<br>ArH), 4.01-4.03 (m, 2H, -<br>OCH <sub>2</sub> -), 3.85-3.92 (m, 4H, -<br>OCH <sub>2</sub> CH <sub>3</sub> ×2), 3.64 (s, 2H, -<br>CH <sub>2</sub> -N), 2.96 (brs, 4H,<br>piperazinyl right H), 2.57<br>(brs, 4H, piperazinyl left H),<br>2.40-2.43 (m, 1H, -CH-OH),               |

|             |                                                                                     |                                                                                                                                                                                                                            |                                                                                                                                                                                                                                                                                                                             |
|-------------|-------------------------------------------------------------------------------------|----------------------------------------------------------------------------------------------------------------------------------------------------------------------------------------------------------------------------|-----------------------------------------------------------------------------------------------------------------------------------------------------------------------------------------------------------------------------------------------------------------------------------------------------------------------------|
|             |                                                                                     |                                                                                                                                                                                                                            | 1.24-1.27 (m, -6H, -CH <sub>3</sub> ×2).                                                                                                                                                                                                                                                                                    |
| <b>30e</b>  | 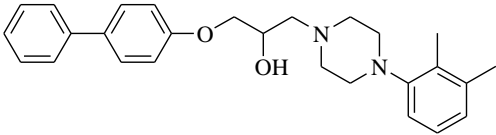   | ESI ( <i>m/z</i> ): [M+H] <sup>+</sup><br>417.3.<br><br>HRESIMS <i>m/z</i> :<br>417.2543 (M <sup>+</sup> +H,<br>calcd for C <sub>27</sub> H <sub>33</sub> N <sub>2</sub> O <sub>2</sub> ,<br>417.2464).                    | <sup>1</sup> H NMR (500 MHz, DMSO), δ (ppm): 6.88-7.61 (m, 12H, ArH), 4.01-4.07 (m, 2H, -OCH <sub>2</sub> -), 3.92-3.95 (m, 1H, -CH-OH), 2.79 (brs, 4H, piperazinyl right H), 2.60 (brs, 4H, piperazinyl left H), 2.43-2.52 (m, 2H, -CH <sub>2</sub> -N), 2.19 (s, 6H, -CH <sub>3</sub> ×2).                                |
| <b>31e*</b> |    | ESI ( <i>m/z</i> ): [M+H] <sup>+</sup><br>417.3.<br><br>HRESIMS <i>m/z</i> :<br>417.2546 (M <sup>+</sup> +H,<br>calcd for C <sub>27</sub> H <sub>33</sub> N <sub>2</sub> O <sub>2</sub> ,<br>417.2464).                    | <sup>1</sup> H NMR (500 MHz, DMSO), δ (ppm): 6.82-7.59 (m, 12H, ArH), 4.01-4.04 (m, 2H, -OCH <sub>2</sub> -), 3.90-3.93 (m, 1H, -CH-OH), 2.76 (brs, 4H, piperazinyl right H), 2.60 (brs, 4H, piperazinyl left H), 2.43-2.50 (m, 2H, -CH <sub>2</sub> -N), 2.17 (s, 3H, -CH <sub>3</sub> ), 2.11 (s, 3H, -CH <sub>3</sub> ). |
| <b>32e*</b> |   | ESI ( <i>m/z</i> ): [M+H] <sup>+</sup><br>457.3.<br><br>HRESIMS <i>m/z</i> :<br>457.1451 (M <sup>+</sup> +H,<br>calcd for<br>C <sub>25</sub> H <sub>27</sub> Cl <sub>2</sub> N <sub>2</sub> O <sub>2</sub> ,<br>457.1371). | <sup>1</sup> H NMR (500 MHz, DMSO), δ (ppm): 6.89-7.60 (m, 12H, ArH), 4.01-4.04 (m, 2H, -OCH <sub>2</sub> -), 3.90-3.93 (m, 1H, -CH-OH), 3.15 (brs, 4H, piperazinyl right H), 2.57 (m, 4H, piperazinyl left H), 2.40-2.52 (m, 2H, -CH <sub>2</sub> -N).                                                                     |
| <b>33e*</b> |  | ESI ( <i>m/z</i> ): [M+H] <sup>+</sup><br>467.2.<br><br>HRESIMS <i>m/z</i> :<br>467.1334 (M <sup>+</sup> +H,<br>calcd for<br>C <sub>25</sub> H <sub>28</sub> BrN <sub>2</sub> O <sub>2</sub> ,<br>467.1256).               | <sup>1</sup> H NMR (500 MHz, DMSO), δ (ppm): 6.94-7.60 (m, 13H, ArH), 4.00-4.05 (m, 2H, -OCH <sub>2</sub> -), 3.91-3.93 (m, 1H, -CH-OH), 2.95 (brs, 4H, piperazinyl right H), 2.63 (brs, 4H, piperazinyl left H), 2.43-2.52 (m, 2H, -CH <sub>2</sub> -N).                                                                   |
| <b>34e*</b> |  | ESI ( <i>m/z</i> ): [M+H] <sup>+</sup><br>467.1.<br><br>HRESIMS <i>m/z</i> :<br>467.1334 (M <sup>+</sup> +H,<br>calcd for<br>C <sub>25</sub> H <sub>28</sub> BrN <sub>2</sub> O <sub>2</sub> ,<br>467.1256).               | <sup>1</sup> H NMR (500 MHz, CDCl <sub>3</sub> ), δ (ppm): 6.79-7.56 (m, 13H, ArH), 4.15-4.19 (m, 1H, -CH-OH), 4.06-4.07 (m, 2H, -OCH <sub>2</sub> -), 3.18-3.21 (m, 4H, piperazinyl right H), 2.83-2.87 (m, 2H, -CH <sub>2</sub> -N), 2.60-2.70 (m, 4H, piperazinyl left H).                                               |

19 **Note: Structures with \* are novel compounds.**

20

21

22

23

24 **Table S2. PCR primers used in this study**

| <b>Primer</b>       | <b>Sequence (5'-3')</b> |
|---------------------|-------------------------|
| GSP1-F <sup>a</sup> | TGAAGTCCATCCATTAGGAT    |
| GSP1-R              | ATCTCTATGCCAGTTTGGAA    |
| RAS1-F              | GGCCATGAGAGAACAATATA    |
| RAS1-R              | GTCTTTCCATTTCTAAATCAC   |
| CDC35-F             | TTCATCAGGGGTTATTTTAC    |
| CDC35-R             | CTCTATCAACCCGCCATTTT    |
| PDE2-F              | ACCACCACCACTACTACTAC    |
| PDE2-R              | AAAATGAGTTGTTCTGTCC     |
| EFG1-F              | TATGCCCCAGCAAACAACCTG   |
| EFG1-R              | TTGTTGTCCTGCTGTCTGTC    |
| TEC1-F              | AGGTTCCCTGGTTTAAGTG     |
| TEC1-R              | ACTGGTATGTGTGGGTGAT     |
| CST20-F             | TTCTGACTTCAAAGACATCAT   |
| CST20-R             | AATGTATATTTCTGGTGGTG    |
| HST7-F              | ACTCCAACATCCAATATAACA   |
| HST7-R              | TTGATTGACGTTCAATGAAGA   |
| CEK1-F              | AGCTATACAACGACCAATTAA   |
| CEK1-R              | CATTAGCTGAATGCATAGCT    |
| CPH1-F              | ATGCAACACTATTTATACCTC   |
| CPH1-R              | CGGATATTGTTGATGATGATA   |
| ALS3-F              | CTAATGCTGCTACGTATAATT   |



|        |                      |
|--------|----------------------|
| ALS3-R | CCTGAAATTGACATGTAGCA |
| HWP1-F | TGGTGCTATTACTATTCCGG |
| HWP1-R | CAATAATAGCAGCACCGAAG |
| ECE1-F | GCTGGTATCATTGCTGATAT |
| ECE1-R | TTCGATGGATTGTTGAACAC |

---

25

26

27

28

29

30

31

32

33

34

35

36

37

38

39

40

41

42

43

44

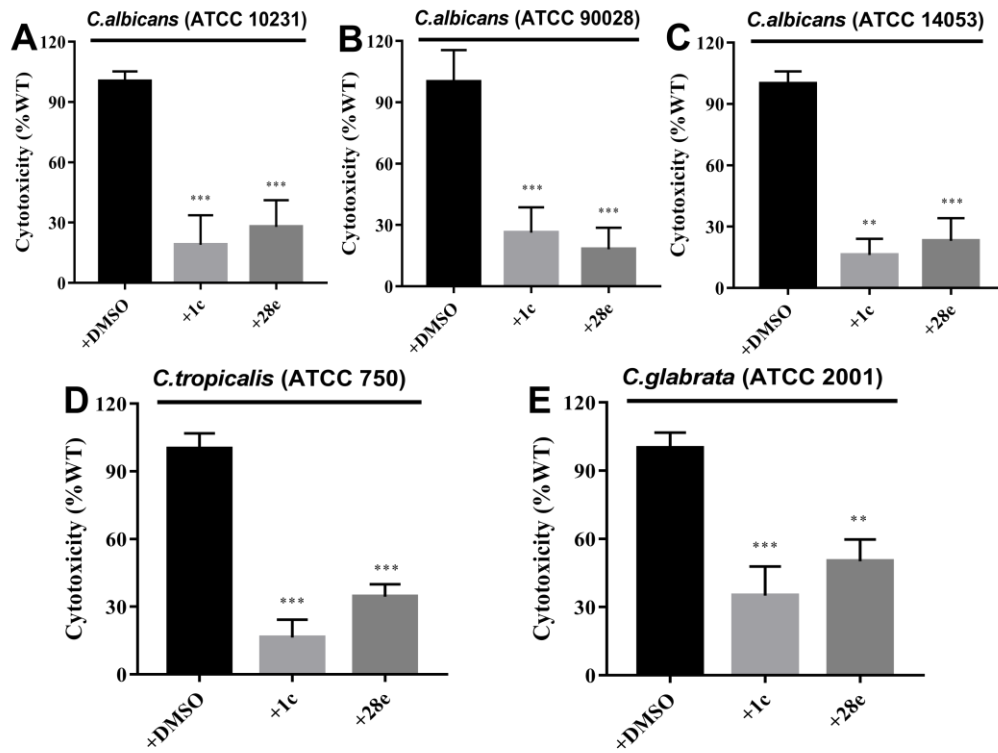

45

46 **Fig. S1.** Effects of piperazine derivatives on different clinic isolated *C. albicans* strains and other  
 47 *Candida* species virulence using a cell line. Cytotoxicity assays were performed with the same  
 48 methods as used in Fig 4B. The final concentration of compound 1c and 28e was 100  $\mu$ M for the  
 49 treatment of five strains. Data are the mean  $\pm$  standard deviation of three independent experiments.

50 \*,  $P < 0.05$ ; \*\*,  $P < 0.01$ ; \*\*\*,  $P < 0.001$  (unpaired  $t$  test).

51

52

53

54

55

56

57

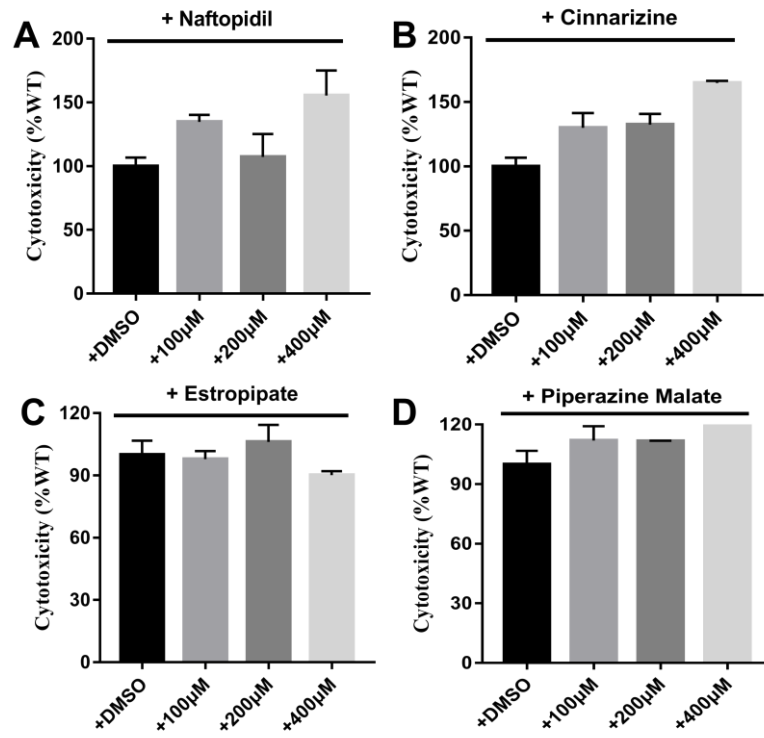

58

59 **Fig. S2.** Influences of different piperazine compounds on *C. albicans* SC5314 virulence using a cell  
 60 line. Data are the mean  $\pm$  standard deviation of three independent experiments.

61
